# Supplementary material for: Response to Hypersalinity of Four Halophytes Growing in Hydroponic Floating Systems: Prospects in the Phytomanagement of High Saline Wastewaters and Extreme Environments
Source: MDPI journal article supplement (doi:10.3390/plants12091737), 2023-04-22
Supplement: s1 [file s1]

---

*Supplementary Material*

## **Response to Hypersalinity of Four Halophytes Growing in Hydroponic Floating Systems: Prospects in the Phytomanagement of High Saline Wastewaters and Extreme Environments**

**Meri Barbafieri<sup>1</sup>, Francesca Bretzel<sup>1</sup>, Andrea Scartazza<sup>1</sup>, Daniela Di Baccio<sup>1\*</sup>, Irene Rosellini<sup>1</sup>, Martina Grifoni<sup>1</sup>, Roberto Pini<sup>1</sup>, Alice Clementi<sup>2</sup>, Elisabetta Franchi<sup>3\*</sup>**

<sup>1</sup> Research Institute on Terrestrial Ecosystems, National Research Council of Italy (IRET-CNR), Via Moruzzi 1, 56124 Pisa, Italy; meri.barbafieri@cnr.it (M.B.); francesca.bretzel@cnr.it (F.B.); andrea.scartazza@cnr.it (A.S.); irene.rosellini@cnr.it (I.R.); grifonimar@gmail.com (M.G.); roberto-pini@cnr.it (R.P.)

<sup>2</sup> Eni S.p.A., Subsurface and Wells R&D Projects, Via Maritano 26, San Donato Milanese, 20097 Milan, Italy; [alice.clementi@eni.com](mailto:alice.clementi@eni.com)

<sup>3</sup> Eni S.p.A., R&D Environmental & Biological Laboratories, Via Maritano 26, San Donato Milanese, 20097 Milan, Italy

\* Correspondence: [daniela.dibaccio@cnr.it](mailto:daniela.dibaccio@cnr.it) (D.D.B.); [elisabetta.franchi@eni.com](mailto:elisabetta.franchi@eni.com) (E.F.)

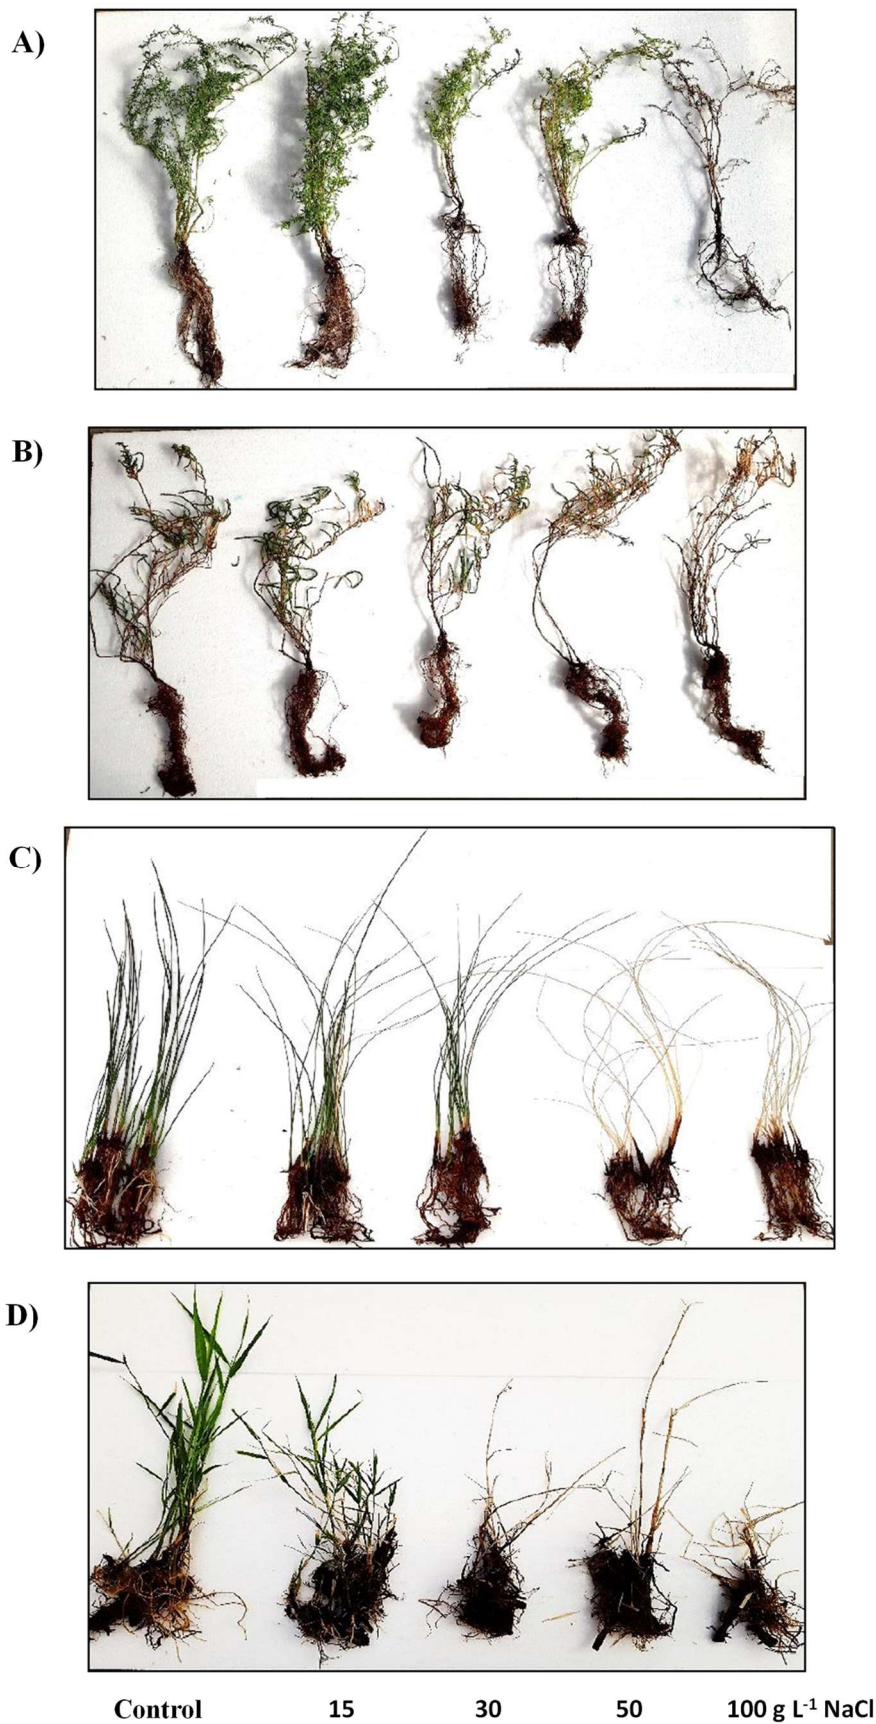

**Supplementary Figure S1.** *Suaeda fruticosa* (A), *Halocnemum strobilaceum* (B), *Juncus maritimus* (C) and *Phragmites australis* (D) after four weeks of treatment with 0 (Control), 15, 30, 50 and 100 g L<sup>-1</sup> NaCl (corresponding to 0, 257, 514, 856 and 1712 mM NaCl, respectively).

**Supplementary Table S1.** Fresh weight (FW, g plant<sup>-1</sup>) of different organs of the four halophyte plant species treated with 0, 15, 30, 50 and 100 g L<sup>-1</sup> NaCl (corresponding to 0, 257, 514, 856 and 1712 mM NaCl, respectively) for 28 days. Values are means  $\pm$  standard error (SE) of four plants ( $n = 4$ ). Results of the two-way ANOVA ( $P \leq 0.05$ ) for the effect of NaCl treatments and species, and of their interaction are shown (F and  $P$  values). When the interaction between factors was significant, the Fisher LSD-test ( $P \leq 0.05$ ) was applied: significantly different data are followed by different letters within each column; values followed by a different lower case letter are significantly different across species and NaCl treatments.

| <i>Suaeda fruticosa</i>        |                     |                      |                     |                      |
|--------------------------------|---------------------|----------------------|---------------------|----------------------|
| NaCl treatment                 | leaf FW             | stem FW              | root FW             | total FW             |
| Control (0 g L <sup>-1</sup> ) | 19.10 $\pm$ 2.65 b  | 9.80 $\pm$ 1.60 c-f  | 5.40 $\pm$ 0.40 d   | 34.30 $\pm$ 4.65 cd  |
| 15 g L <sup>-1</sup>           | 25.60 $\pm$ 1.40 a  | 12.20 $\pm$ 2.40 cd  | 4.41 $\pm$ 0.40 d   | 42.21 $\pm$ 2.80 b   |
| 30 g L <sup>-1</sup>           | 6.80 $\pm$ 0.60 f-h | 6.65 $\pm$ 1.35 c-l  | 2.81 $\pm$ 0.20 d   | 16.26 $\pm$ 1.75 g-l |
| 50 g L <sup>-1</sup>           | 8.60 $\pm$ 1.20 ef  | 12.78 $\pm$ 3.03 c   | 5.56 $\pm$ 1.51 d   | 26.93 $\pm$ 5.74 d-f |
| 100 g L <sup>-1</sup>          | 4.36 $\pm$ 0.20 g-i | 6.10 $\pm$ 0.35 f-l  | 3.17 $\pm$ 0.29 d   | 13.63 $\pm$ 0.84 il  |
| <i>Halocnemum strobilaceum</i> |                     |                      |                     |                      |
| NaCl treatment                 | leaf FW             | stem FW              | root FW             | total FW             |
| Control (0 g L <sup>-1</sup> ) | 12.43 $\pm$ 1.03 cd | 5.80 $\pm$ 1.00 g-l  | 5.40 $\pm$ 0.40 d   | 23.13 $\pm$ 2.45 e-g |
| 15 g L <sup>-1</sup>           | 9.99 $\pm$ 1.56 cd  | 4.91 $\pm$ 0.55 il   | 3.81 $\pm$ 0.83 d   | 18.70 $\pm$ 1.85 e-h |
| 30 g L <sup>-1</sup>           | 12.20 $\pm$ 0.90 cd | 5.20 $\pm$ 0.70 h-l  | 5.25 $\pm$ 0.90 d   | 22.65 $\pm$ 2.50 e-g |
| 50 g L <sup>-1</sup>           | 10.43 $\pm$ 0.83 de | 4.67 $\pm$ 0.53 il   | 4.77 $\pm$ 1.07 d   | 19.87 $\pm$ 0.77 e-i |
| 100 g L <sup>-1</sup>          | 4.28 $\pm$ 0.42 g-l | 4.25 $\pm$ 0.64 l    | 2.76 $\pm$ 0.47 d   | 11.29 $\pm$ 0.25 l   |
| <i>Juncus maritimus</i>        |                     |                      |                     |                      |
| NaCl treatment                 | shoot FW            | rhizome FW           | roots FW            | total FW             |
| Control (0 g L <sup>-1</sup> ) | 13.73 $\pm$ 1.18 c  | 9.75 $\pm$ 0.55 c-g  | 26.80 $\pm$ 1.95 a  | 50.28 $\pm$ 0.22 a   |
| 15 g L <sup>-1</sup>           | 12.15 $\pm$ 1.65 cd | 8.93 $\pm$ 0.63 c-h  | 22.85 $\pm$ 1.30 b  | 43.93 $\pm$ 2.33 ab  |
| 30 g L <sup>-1</sup>           | 7.25 $\pm$ 0.30 fg  | 9.60 $\pm$ 0.95 c-g  | 25.83 $\pm$ 2.08 ab | 42.68 $\pm$ 3.33 ab  |
| 50 g L <sup>-1</sup>           | 4.39 $\pm$ 0.29 g-i | 8.65 $\pm$ 1.05 c-i  | 11.45 $\pm$ 1.70 c  | 24.49 $\pm$ 3.04 ef  |
| 100 g L <sup>-1</sup>          | 4.12 $\pm$ 0.37 h-l | 10.25 $\pm$ 1.20 c-e | 13.90 $\pm$ 1.20 c  | 28.27 $\pm$ 2.77 de  |
| <i>Phragmites australis</i>    |                     |                      |                     |                      |
| NaCl treatment                 | shoot FW            | rhizome FW           | roots FW            | total FW             |
| Control (0 g L <sup>-1</sup> ) | 7.80 $\pm$ 1.50 ef  | 26.58 $\pm$ 1.88 b   | 4.62 $\pm$ 0.68 d   | 39.00 $\pm$ 1.06 bc  |
| 15 g L <sup>-1</sup>           | 4.12 $\pm$ 0.80 h-l | 31.40 $\pm$ 2.25 a   | 5.23 $\pm$ 0.38 d   | 40.75 $\pm$ 3.42 bc  |
| 30 g L <sup>-1</sup>           | 1.43 $\pm$ 0.21 il  | 11.60 $\pm$ 1.20 cd  | 3.36 $\pm$ 0.12 d   | 16.39 $\pm$ 1.53 g-l |
| 50 g L <sup>-1</sup>           | 1.79 $\pm$ 0.21 il  | 11.58 $\pm$ 1.48 cd  | 3.35 $\pm$ 0.22 d   | 16.71 $\pm$ 1.46 f-l |
| 100 g L <sup>-1</sup>          | 1.31 $\pm$ 0.12 l   | 10.35 $\pm$ 1.45 c-e | 2.81 $\pm$ 0.29 d   | 14.47 $\pm$ 1.86 h-l |
| Two-way ANOVA – F ( $P$ )      |                     |                      |                     |                      |
| NaCl                           | 76.64 (<0.001)      | 19.07 (<0.001)       | 16.57 (<0.001)      | 48.25 (<0.001)       |
| Species                        | 78.77 (<0.001)      | 85.41 (<0.001)       | 311.02 (<0.001)     | 43.65 (<0.001)       |
| NaCl x species                 | 12.94 (<0.001)      | 13.46 (<0.001)       | 11.67 (<0.001)      | 6.81 (0.001)         |

**Supplementary Table S2.** Water status and relative biomass partitioning between aerial parts and roots of the four halophytic plant species treated with 0 (control), 15, 30, 50 and 100 g L<sup>-1</sup> NaCl (corresponding to 0, 257, 514, 856 and 1712 mM NaCl, respectively) for four weeks. Values are means  $\pm$  standard error (SE) of four plants ( $n = 4$ ). Statistics as in Table S1. RWC (%), relative water content as percentage of fresh weight, SMR, shoot mass ratio, and RMR, root mass ratio, were calculated as in Material and Methods. Before statistical analysis, percentage data were subjected to an arc sine or angular transformation.

| <i>Suaeda fruticosa</i>        |                  |                   |                   |                     |                     |                     |
|--------------------------------|------------------|-------------------|-------------------|---------------------|---------------------|---------------------|
| NaCl                           | leaf RWC         | stem RWC          | root RWC          | root/shoot          | SMR                 | RMR                 |
| Control (0 g L <sup>-1</sup> ) | 80.39 $\pm$ 1.31 | 56.67 $\pm$ 1.49  | 43.33 $\pm$ 0.02  | 0.39 $\pm$ 0.02 g-i | 0.72 $\pm$ 0.01 bc  | 0.28 $\pm$ 0.01 cd  |
| 15 g L <sup>-1</sup>           | 84.48 $\pm$ 0.25 | 58.07 $\pm$ 1.12  | 46.64 $\pm$ 0.75  | 0.26 $\pm$ 0.01 i   | 0.79 $\pm$ 0.005 a  | 0.21 $\pm$ 0.005 e  |
| 30 g L <sup>-1</sup>           | 79.77 $\pm$ 0.90 | 32.46 $\pm$ 16.23 | 40.56 $\pm$ 13.93 | 0.29 $\pm$ 0.05 hi  | 0.78 $\pm$ 0.03 ab  | 0.22 $\pm$ 0.03 de  |
| 50 g L <sup>-1</sup>           | 83.16 $\pm$ 3.57 | 60.79 $\pm$ 13.10 | 56.68 $\pm$ 16.87 | 0.36 $\pm$ 0.01 g-i | 0.74 $\pm$ 0.01 a-c | 0.26 $\pm$ 0.01 c-e |
| 100 g L <sup>-1</sup>          | 79.10 $\pm$ 1.82 | 57.04 $\pm$ 3.04  | 34.23 $\pm$ 3.45  | 0.60 $\pm$ 0.10 f-h | 0.63 $\pm$ 0.04 d   | 0.37 $\pm$ 0.04 b   |
| <i>Halocnemum strobilaceum</i> |                  |                   |                   |                     |                     |                     |
| NaCl                           | leaf RWC         | stem RWC          | root RWC          | root/shoot          | SMR                 | RMR                 |
| Control (0 g L <sup>-1</sup> ) | 73.67 $\pm$ 1.13 | 33.43 $\pm$ 7.08  | 40.54 $\pm$ 0.96  | 0.41 $\pm$ 0.01 g-i | 0.71 $\pm$ 0.003 c  | 0.29 $\pm$ 0.003 c  |
| 15 g L <sup>-1</sup>           | 68.10 $\pm$ 6.14 | 39.94 $\pm$ 2.60  | 34.89 $\pm$ 25.31 | 0.37 $\pm$ 0.03 g-i | 0.73 $\pm$ 0.02 bc  | 0.27 $\pm$ 0.02 cd  |
| 30 g L <sup>-1</sup>           | 73.85 $\pm$ 3.40 | 30.43 $\pm$ 3.98  | 43.69 $\pm$ 4.03  | 0.43 $\pm$ 0.04 g-i | 0.70 $\pm$ 0.02 c   | 0.30 $\pm$ 0.02 c   |
| 50 g L <sup>-1</sup>           | 73.46 $\pm$ 3.25 | 29.39 $\pm$ 16.96 | 49.05 $\pm$ 3.43  | 0.41 $\pm$ 0.08 g-i | 0.71 $\pm$ 0.04 bc  | 0.29 $\pm$ 0.04 c   |
| 100 g L <sup>-1</sup>          | 67.37 $\pm$ 1.80 | 33.09 $\pm$ 19.67 | 50.20 $\pm$ 7.88  | 0.33 $\pm$ 0.06 g-i | 0.75 $\pm$ 0.03 a-c | 0.25 $\pm$ 0.03 c-e |
| <i>Juncus maritimus</i>        |                  |                   |                   |                     |                     |                     |
| NaCl                           | shoot RWC        | rhizome RWC       | root RWC          | root/shoot          | SMR                 | RMR                 |
| Control (0 g L <sup>-1</sup> ) | 68.07 $\pm$ 1.06 | 72.88 $\pm$ 4.79  | 82.25 $\pm$ 2.25  | 1.08 $\pm$ 0.002 de | 0.37 $\pm$ 0.01 e   | 0.40 $\pm$ 0.02 ab  |
| 15 g L <sup>-1</sup>           | 63.62 $\pm$ 3.34 | 64.28 $\pm$ 9.22  | 76.69 $\pm$ 0.12  | 1.22 $\pm$ 0.01 cd  | 0.34 $\pm$ 0.01 e   | 0.42 $\pm$ 0.01 ab  |
| 30 g L <sup>-1</sup>           | 60.87 $\pm$ 0.58 | 67.00 $\pm$ 1.84  | 80.05 $\pm$ 0.05  | 1.81 $\pm$ 0.09 a   | 0.26 $\pm$ 0.02 f   | 0.46 $\pm$ 0.004 a  |
| 50 g L <sup>-1</sup>           | 63.02 $\pm$ 1.20 | 69.91 $\pm$ 0.50  | 78.56 $\pm$ 0.87  | 1.50 $\pm$ 0.02 bc  | 0.24 $\pm$ 0.002 f  | 0.37 $\pm$ 0.001 b  |
| 100 g L <sup>-1</sup>          | 59.78 $\pm$ 0.70 | 70.01 $\pm$ 0.10  | 79.80 $\pm$ 0.43  | 1.70 $\pm$ 0.001 ab | 0.22 $\pm$ 0.001 fg | 0.37 $\pm$ 0.002 b  |
| <i>Phragmites australis</i>    |                  |                   |                   |                     |                     |                     |
| NaCl                           | shoot RWC        | rhizome RWC       | root RWC          | root/shoot          | SMR                 | RMR                 |
| Control (0 g L <sup>-1</sup> ) | 79.76 $\pm$ 1.26 | 72.35 $\pm$ 2.52  | 87.63 $\pm$ 0.58  | 0.38 $\pm$ 0.09 g-i | 0.16 $\pm$ 0.02 gh  | 0.06 $\pm$ 0.01 g   |
| 15 g L <sup>-1</sup>           | 67.87 $\pm$ 4.86 | 74.77 $\pm$ 1.01  | 84.60 $\pm$ 4.06  | 0.63 $\pm$ 0.18 fg  | 0.13 $\pm$ 0.002 h  | 0.08 $\pm$ 0.02 fg  |
| 30 g L <sup>-1</sup>           | 69.27 $\pm$ 9.82 | 72.62 $\pm$ 0.12  | 87.58 $\pm$ 2.40  | 1.02 $\pm$ 0.25 de  | 0.11 $\pm$ 0.03 h   | 0.10 $\pm$ 0.01 fg  |
| 50 g L <sup>-1</sup>           | 59.70 $\pm$ 0.71 | 65.21 $\pm$ 1.60  | 81.94 $\pm$ 2.38  | 0.87 $\pm$ 0.25 ef  | 0.13 $\pm$ 0.01 h   | 0.12 $\pm$ 0.03 fg  |
| 100 g L <sup>-1</sup>          | 61.67 $\pm$ 9.76 | 69.44 $\pm$ 1.07  | 80.56 $\pm$ 2.57  | 1.12 $\pm$ 0.13 de  | 0.12 $\pm$ 0.02 h   | 0.13 $\pm$ 0.01 f   |
| Two-way ANOVA – F (P)          |                  |                   |                   |                     |                     |                     |
| NaCl                           | 2.36 (0.088)     | 0.69 (0.605)      | 0.36 (0.833)      | 9.76 (<0.001)       | 7.08 (0.001)        | 2.01 (0.132)        |
| species                        | 20.83 (<0.001)   | 20.97 (<0.001)    | 38.10 (<0.001)    | 117.97 (<0.001)     | 1044.10 (<0.001)    | 190.73 (<0.001)     |
| NaCl x species                 | 1.14 (0.382)     | 0.63 (0.793)      | 0.57 (0.841)      | 3.05 (0.013)        | 4.75 (0.001)        | 4.81 (0.001)        |

**Supplementary Table S3.** Chlorophyll *a* (Chl *a*) and chlorophyll *b* (Chl *b*) in leaves of *S. fruticosa*, *H. strobilaceum*, *J. maritimus* and *P. australis* exposed for 28 days to increasing NaCl concentrations (0 – Control, 15, 30, 50 and 100 g L<sup>-1</sup> NaCl, corresponding to 0, 257, 514, 856 and 1712 mM NaCl). Data (mean values ± SE) reported refer to at least three extractions or replications (*n* = 3-5). For each time point (7, 14, 21 and 28 days of NaCl exposure), the results of a one way-ANOVA (NaCl-treated plants against controls) are indicated (\*, *P* ≤ 0.05; \*\*, *P* ≤ 0.01; \*\*\*, *P* ≤ 0.001; n. s., not significant, *P* > 0.05). Different letters correspond to significant differences for the Fisher's LSD post-hoc test (*P* ≤ 0.05).

| Chl <i>a</i>                   | <i>Suaeda fruticosa</i>        |              |              |             |
|--------------------------------|--------------------------------|--------------|--------------|-------------|
| Time                           | 7 days                         | 14 days      | 21 days      | 28 days     |
| Control (0 g L <sup>-1</sup> ) | 7.70±0.45 a                    | 3.65±0.75 a  | 6.63±0.41 a  | 6.26±0.27 a |
| 15 g L <sup>-1</sup>           | 4.60±1.10 b                    | 4.42±0.72 ab | 4.12±0.23 b  | 5.75±0.18 a |
| 30 g L <sup>-1</sup>           | 3.98±0.31 b                    | 1.89±0.38 b  | 1.65±0.11 c  | 2.63±0.17 b |
| 50 g L <sup>-1</sup>           | 4.65±1.23 b                    | 1.55±0.57 b  | 2.24±0.12 c  | 2.29±0.04 b |
| 100 g L <sup>-1</sup>          | 1.18±0.09 c                    | 1.76±0.61 b  | 1.52±0.31 c  | 0.56±0.06 c |
| one way-ANOVA ( <i>P</i> )     | **                             | *            | ***          | ***         |
|                                | <i>Halocnemum strobilaceum</i> |              |              |             |
| Time                           | 7 days                         | 14 days      | 21 days      | 28 days     |
| Control (0 g L <sup>-1</sup> ) | 3.08±0.09 a                    | 3.15±0.52 a  | 3.16±0.76 a  | 3.05±0.05 a |
| 15 g L <sup>-1</sup>           | 1.94±0.06 c                    | 2.27±0.36 ab | 2.32±0.21 ab | 2.88±0.04 a |
| 30 g L <sup>-1</sup>           | 2.39±0.15 b                    | 1.89±0.08 ab | 2.04±0.22 b  | 3.22±0.27 a |
| 50 g L <sup>-1</sup>           | 1.65±0.08 cd                   | 1.48±0.08 b  | 2.31±0.11 b  | 2.16±0.11 b |
| 100 g L <sup>-1</sup>          | 1.39±0.04 d                    | 1.70±0.36 b  | 1.19±0.11 c  | 0.71±0.03 c |
| one way-ANOVA ( <i>P</i> )     | ***                            | 0.089        | **           | ***         |
|                                | <i>Juncus maritimus</i>        |              |              |             |
| Time                           | 7 days                         | 14 days      | 21 days      | 28 days     |
| Control (0 g L <sup>-1</sup> ) | 2.77±0.31 a                    | 2.10±0.06 b  | 2.55±0.26 a  | 4.66±0.41 a |
| 15 g L <sup>-1</sup>           | 3.03±0.20 a                    | 0.42±0.03 d  | 1.19±0.07 b  | 1.72±0.07 b |
| 30 g L <sup>-1</sup>           | 2.91±0.10 a                    | 2.56±0.21 a  | 0.94±0.05 b  | 1.76±0.06 b |
| 50 g L <sup>-1</sup>           | 2.14±0.06 b                    | 0.98±0.01 c  | 0.46±0.08 c  | 0.17±0.01 c |
| 100 g L <sup>-1</sup>          | 2.19±0.06 b                    | 0.70±0.06 cd | 0.56±0.02 c  | 0.49±0.03 c |
| one way-ANOVA ( <i>P</i> )     | **                             | ***          | ***          | ***         |
|                                | <i>Phragmites australis</i>    |              |              |             |
| Time                           | 7 days                         | 14 days      | 21 days      | 28 days     |
| Control (0 g L <sup>-1</sup> ) | 2.98±0.97                      | 3.60±1.34    | 6.79±1.39    | 5.19±0.30 a |
| 15 g L <sup>-1</sup>           | 1.51±0.07                      | 2.52±0.76    | 7.87±2.48    | 4.37±0.28 b |
| 30 g L <sup>-1</sup>           | 1.22±0.40                      | 0.74±0.21    |              |             |
| 50 g L <sup>-1</sup>           | 2.19±0.47                      | 1.72±0.27    |              |             |
| 100 g L <sup>-1</sup>          | 1.23±0.27                      | 1.04±0.30    |              |             |
| one way-ANOVA ( <i>P</i> )     | n. s.                          | n. s.        | n. s.        | *           |

**Supplementary Table S4.** Chlorophyll *b* (Chl *b*) in leaves of *S. fruticosa*, *H. strobilaceum*, *J. maritimus* and *P. australis* (D) exposed for 28 days to increasing NaCl concentrations (0, Control; 15, 30, 50, and 100 g L<sup>-1</sup> NaCl, corresponding to 0, 257, 514, 856 and 1712 mM NaCl). Data (mean values  $\pm$  SE) reported refer to at least three extractions or replications ( $n = 3$ -5). Statistics as in Table S3.

| Chl <i>b</i>                   |  | <i>Suaeda fruticosa</i>        |                     |                   |                   |
|--------------------------------|--|--------------------------------|---------------------|-------------------|-------------------|
| Time                           |  | 7 days                         | 14 days             | 21 days           | 28 days           |
| Control (0 g L <sup>-1</sup> ) |  | 3.00 $\pm$ 0.32 a              | 1.42 $\pm$ 0.21 ab  | 2.36 $\pm$ 0.15 a | 2.13 $\pm$ 0.16 a |
| 15 g L <sup>-1</sup>           |  | 1.84 $\pm$ 0.38 b              | 1.61 $\pm$ 0.25 a   | 1.45 $\pm$ 0.08 b | 1.97 $\pm$ 0.14 a |
| 30 g L <sup>-1</sup>           |  | 1.61 $\pm$ 0.04 b              | 0.76 $\pm$ 0.15 b   | 0.66 $\pm$ 0.04 c | 0.91 $\pm$ 0.09 b |
| 50 g L <sup>-1</sup>           |  | 1.95 $\pm$ 0.47 b              | 0.71 $\pm$ 0.26 b   | 0.91 $\pm$ 0.06 c | 0.89 $\pm$ 0.02 b |
| 100 g L <sup>-1</sup>          |  | 0.45 $\pm$ 0.06 c              | 0.83 $\pm$ 0.29 b   | 0.84 $\pm$ 0.16 c | 0.35 $\pm$ 0.03 b |
| one way-ANOVA ( <i>P</i> )     |  | **                             | n. s. (0.072)       | ***               | ***               |
|                                |  | <i>Halocnemum strobilaceum</i> |                     |                   |                   |
| Time                           |  | 7 days                         | 14 days             | 21 days           | 28 days           |
| Control (0 g L <sup>-1</sup> ) |  | 1.11 $\pm$ 0.03 a              | 0.96 $\pm$ 0.05 a   | 1.11 $\pm$ 0.25 a | 1.02 $\pm$ 0.02 a |
| 15 g L <sup>-1</sup>           |  | 0.70 $\pm$ 0.01 c              | 0.70 $\pm$ 0.003 ab | 0.82 $\pm$ 0.08 b | 1.00 $\pm$ 0.01 a |
| 30 g L <sup>-1</sup>           |  | 0.86 $\pm$ 0.06 b              | 0.61 $\pm$ 0.11 b   | 0.78 $\pm$ 0.06 b | 1.10 $\pm$ 0.11 a |
| 50 g L <sup>-1</sup>           |  | 0.64 $\pm$ 0.06 cd             | 0.47 $\pm$ 0.05 b   | 0.83 $\pm$ 0.03 b | 0.78 $\pm$ 0.01 b |
| 100 g L <sup>-1</sup>          |  | 0.51 $\pm$ 0.02 d              | 0.59 $\pm$ 0.09 b   | 0.48 $\pm$ 0.03 c | 0.34 $\pm$ 0.01 c |
| one way-ANOVA ( <i>P</i> )     |  | **                             | *                   | **                | ***               |
|                                |  | <i>Juncus maritimus</i>        |                     |                   |                   |
| Time                           |  | 7 days                         | 14 days             | 21 days           | 28 days           |
| Control (0 g L <sup>-1</sup> ) |  | 0.93 $\pm$ 0.10 a              | 0.66 $\pm$ 0.02 b   | 0.82 $\pm$ 0.09 a | 1.46 $\pm$ 0.12 a |
| 15 g L <sup>-1</sup>           |  | 0.96 $\pm$ 0.05 a              | 0.16 $\pm$ 0.01 e   | 0.43 $\pm$ 0.02 b | 0.55 $\pm$ 0.02 b |
| 30 g L <sup>-1</sup>           |  | 0.96 $\pm$ 0.01 a              | 0.80 $\pm$ 0.06 a   | 0.31 $\pm$ 0.02 b | 0.56 $\pm$ 0.02 b |
| 50 g L <sup>-1</sup>           |  | 0.75 $\pm$ 0.01 b              | 0.48 $\pm$ 0.04 c   | 0.28 $\pm$ 0.05 b | 0.11 $\pm$ 0.01 c |
| 100 g L <sup>-1</sup>          |  | 0.73 $\pm$ 0.01 b              | 0.30 $\pm$ 0.03 d   | 0.39 $\pm$ 0.05 b | 0.33 $\pm$ 0.02 d |
| one way-ANOVA ( <i>P</i> )     |  | **                             | ***                 | ***               | ***               |
|                                |  | <i>Phragmites australis</i>    |                     |                   |                   |
| Time                           |  | 7 days                         | 14 days             | 21 days           | 28 days           |
| Control (0 g L <sup>-1</sup> ) |  | 0.89 $\pm$ 0.97                | 1.08 $\pm$ 0.42     | 2.11 $\pm$ 0.43   | 1.52 $\pm$ 0.10 a |
| 15 g L <sup>-1</sup>           |  | 0.41 $\pm$ 0.07                | 0.67 $\pm$ 0.19     | 2.09 $\pm$ 0.63   | 1.28 $\pm$ 0.11 b |
| 30 g L <sup>-1</sup>           |  | 0.45 $\pm$ 0.40                | 0.28 $\pm$ 0.09     |                   |                   |
| 50 g L <sup>-1</sup>           |  | 0.79 $\pm$ 0.47                | 1.73 $\pm$ 0.16     |                   |                   |
| 100 g L <sup>-1</sup>          |  | 0.40 $\pm$ 0.27                | 0.38 $\pm$ 0.11     |                   |                   |
| one way-ANOVA ( <i>P</i> )     |  | n. s.                          | n. s.               | n. s.             | *                 |

**Supplementary Table S5.** Nitrogen to phosphorous ratio (N:P) in different organs of the four halophyte plant species treated with 0, 15, 30, 50 and 100 g L<sup>-1</sup> NaCl (corresponding to 0, 257, 514, 856 and 1712 mM NaCl, respectively) for 28 days. Two-way ANOVA. Values are means  $\pm$  standard deviation (SD) of two-three extractions ( $n = 2-3$ ) derived from bulked vegetal material of four plants for each species and NaCl treatment. Statistics as in Table S1.

| <i>Suaeda fruticosa</i>        |                     |                      |                       |
|--------------------------------|---------------------|----------------------|-----------------------|
| NaCl treatment                 | leaf N:P            | stem N:P             | root N:P              |
| Control (0 g L <sup>-1</sup> ) | 15.56 $\pm$ 1.56 f  | 11.95 $\pm$ 0.75 e-g | 8.47 $\pm$ 0.55 c     |
| 15 g L <sup>-1</sup>           | 20.77 $\pm$ 0.79 de | 11.08 $\pm$ 0.02 e-h | 5.68 $\pm$ 0.59 c     |
| 30 g L <sup>-1</sup>           | 22.27 $\pm$ 1.93 cd | 13.36 $\pm$ 2.07 d-f | 6.21 $\pm$ 0.77 c     |
| 50 g L <sup>-1</sup>           | 18.87 $\pm$ 0.97 e  | 7.09 $\pm$ 0.93 i-n  | 2.99 $\pm$ 0.34 c     |
| 100 g L <sup>-1</sup>          | 10.44 $\pm$ 0.27 gh | 5.49 $\pm$ 0.12 mn   | 3.97 $\pm$ 0.24 c     |
| <i>Halocnemum strobilaceum</i> |                     |                      |                       |
| NaCl treatment                 | leaf N:P            | stem N:P             | root N:P              |
| Control (0 g L <sup>-1</sup> ) | 22.62 $\pm$ 0.46 cd | 16.48 $\pm$ 1.24 bc  | 13.73 $\pm$ 0.73 c    |
| 15 g L <sup>-1</sup>           | 23.95 $\pm$ 1.26 c  | 15.60 $\pm$ 0.94 cd  | 12.91 $\pm$ 0.08 c    |
| 30 g L <sup>-1</sup>           | 26.79 $\pm$ 1.38 b  | 18.90 $\pm$ 4.04 b   | 12.95 $\pm$ 0.19 c    |
| 50 g L <sup>-1</sup>           | 31.22 $\pm$ 3.73 a  | 14.04 $\pm$ 3.18 c-e | 14.21 $\pm$ 1.28 c    |
| 100 g L <sup>-1</sup>          | 15.53 $\pm$ 0.82 f  | 6.94 $\pm$ 0.31 l-n  | 8.80 $\pm$ 0.04 c     |
| <i>Juncus maritimus</i>        |                     |                      |                       |
| NaCl treatment                 | shoot N:P           | rhizome N:P          | roots N:P             |
| Control (0 g L <sup>-1</sup> ) | 14.85 $\pm$ 2.03 f  | 22.36 $\pm$ 1.37 a   | 397.30 $\pm$ 139.06 a |
| 15 g L <sup>-1</sup>           | 19.28 $\pm$ 0.18 e  | 11.46 $\pm$ 2.09 e-h | 207.35 $\pm$ 71.54 b  |
| 30 g L <sup>-1</sup>           | 8.09 $\pm$ 0.30 hi  | 5.60 $\pm$ 0.79 mn   | n. d.                 |
| 50 g L <sup>-1</sup>           | 11.58 $\pm$ 0.59 g  | 5.35 $\pm$ 0.96 n    | 48.28 $\pm$ 9.72 c    |
| 100 g L <sup>-1</sup>          | 7.33 $\pm$ 0.14 i   | 4.10 $\pm$ 0.22 n    | 48.61 $\pm$ 12.31 c   |
| <i>Phragmites australis</i>    |                     |                      |                       |
| NaCl treatment                 | shoot N:P           | rhizome N:P          | roots N:P             |
| Control (0 g L <sup>-1</sup> ) | 10.38 $\pm$ 0.30 gh | 10.09 $\pm$ 0.28 g-i | 14.40 $\pm$ 5.04 c    |
| 15 g L <sup>-1</sup>           | 7.88 $\pm$ 0.29 hi  | 11.45 $\pm$ 0.38 e-h | 9.80 $\pm$ 2.45 c     |
| 30 g L <sup>-1</sup>           | 7.07 $\pm$ 0.25 hi  | 8.49 $\pm$ 0.64 h-m  | 5.72 $\pm$ 1.31 c     |
| 50 g L <sup>-1</sup>           | 7.58 $\pm$ 0.35 i   | 9.99 $\pm$ 1.09 g-l  | 7.23 $\pm$ 2.39 c     |
| 100 g L <sup>-1</sup>          | 7.79 $\pm$ 0.41 hi  | 10.85 $\pm$ 0.30 f-h | 12.76 $\pm$ 4.72 c    |
| Two-way ANOVA – F (P)          |                     |                      |                       |
| NaCl                           | 36.47 (<0.001)      | 36.84 (<0.001)       | 6.86 (0.003)          |
| Species                        | 242.16 (<0.001)     | 22.74 (<0.001)       | 24.26 (<0.001)        |
| NaCl x species                 | 15.77 (<0.001)      | 14.91 (<0.001)       | 6.10 (0.001)          |

**Supplementary Table S6.** Correlations coefficients (R2) between growth, physiological and chemical attributes in leaves or shoot of *S. fruticosa* (A), *H. strobilaceum* (B), *J. maritimus* (C), and *P. australis* (D) after 28 days of treatment with 0, 15, 30, 50 and 100 g L<sup>-1</sup> NaCl (corresponding to 0, 257, 514, 856 and 1712 mM NaCl, respectively). Combinations which performed R2 ≥ 0.570 are indicated in bold.

A) *Suaeda fruticosa*

|                  | leaf DW     | leaf RWC | Fv/Fm        | Φ PSII       | NPQ          | Chl <i>a</i> | Chl <i>b</i> | Car          | Chl <i>a+b</i> | Chl <i>a/b</i> | N            | P           | K            | Ca           | Mg    | Na           | K/Na        | Ca/Na |
|------------------|-------------|----------|--------------|--------------|--------------|--------------|--------------|--------------|----------------|----------------|--------------|-------------|--------------|--------------|-------|--------------|-------------|-------|
| leaf DW          | 1.00        |          |              |              |              |              |              |              |                |                |              |             |              |              |       |              |             |       |
| leaf RWC         | 0.37        | 1.00     |              |              |              |              |              |              |                |                |              |             |              |              |       |              |             |       |
| Fv/Fm            | <b>0.58</b> | 0.41     | 1.00         |              |              |              |              |              |                |                |              |             |              |              |       |              |             |       |
| Φ PSII           | <b>0.62</b> | 0.46     | <b>0.93</b>  | 1.00         |              |              |              |              |                |                |              |             |              |              |       |              |             |       |
| NPQ              | -0.11       | 0.08     | 0.54         | 0.23         | 1.00         |              |              |              |                |                |              |             |              |              |       |              |             |       |
| Chl <i>a</i>     | <b>0.96</b> | 0.33     | <b>0.75</b>  | <b>0.79</b>  | 0.02         | 1.00         |              |              |                |                |              |             |              |              |       |              |             |       |
| Chl <i>b</i>     | <b>0.96</b> | 0.34     | <b>0.74</b>  | <b>0.78</b>  | 0.04         | <b>0.99</b>  | 1.00         |              |                |                |              |             |              |              |       |              |             |       |
| Car              | <b>0.89</b> | 0.37     | <b>0.86</b>  | <b>0.86</b>  | 0.23         | <b>0.97</b>  | <b>0.98</b>  | 1.00         |                |                |              |             |              |              |       |              |             |       |
| Chl <i>a + b</i> | <b>0.96</b> | 0.33     | <b>0.75</b>  | <b>0.79</b>  | 0.02         | <b>0.99</b>  | <b>0.99</b>  | <b>0.97</b>  | 1.00           |                |              |             |              |              |       |              |             |       |
| Chl <i>a/b</i>   | <b>0.69</b> | 0.33     | <b>0.96</b>  | <b>0.94</b>  | 0.37         | <b>0.85</b>  | <b>0.83</b>  | <b>0.91</b>  | <b>0.84</b>    | 1.00           |              |             |              |              |       |              |             |       |
| N                | <b>0.72</b> | 0.04     | 0.18         | 0.29         | -0.38        | <b>0.70</b>  | <b>0.68</b>  | 0.56         | <b>0.69</b>    | 0.36           | 1.00         |             |              |              |       |              |             |       |
| P                | 0.01        | -0.36    | <b>-0.68</b> | <b>-0.59</b> | <b>-0.64</b> | -0.14        | -0.13        | -0.30        | -0.13          | <b>-0.57</b>   | 0.54         | 1.00        |              |              |       |              |             |       |
| K                | -0.30       | 0.17     | -0.40        | -0.39        | -0.20        | -0.46        | -0.46        | -0.49        | -0.46          | -0.42          | <b>-0.58</b> | -0.22       | 1.00         |              |       |              |             |       |
| Ca               | -0.40       | -0.52    | <b>-0.81</b> | <b>-0.78</b> | -0.41        | -0.49        | -0.49        | <b>-0.60</b> | -0.49          | <b>-0.76</b>   | 0.20         | <b>0.89</b> | -0.19        | 1.00         |       |              |             |       |
| Mg               | 0.18        | -0.34    | -0.16        | -0.11        | -0.26        | 0.20         | 0.21         | 0.12         | 0.21           | -0.08          | <b>0.69</b>  | <b>0.76</b> | <b>-0.80</b> | <b>0.67</b>  | 1.00  |              |             |       |
| Na               | <b>0.59</b> | 0.34     | <b>0.97</b>  | <b>0.94</b>  | 0.45         | <b>0.76</b>  | <b>0.75</b>  | <b>0.85</b>  | <b>0.76</b>    | <b>0.97</b>    | 0.18         | -0.70       | -0.32        | <b>-0.85</b> | -0.23 | 1.00         |             |       |
| K/Na             | -0.54       | -0.18    | <b>-0.90</b> | <b>-0.84</b> | -0.49        | <b>-0.75</b> | <b>-0.74</b> | <b>-0.84</b> | <b>-0.75</b>   | <b>-0.89</b>   | -0.40        | 0.40        | <b>0.76</b>  | 0.49         | -0.25 | <b>-0.85</b> | 1.00        |       |
| Ca/Na            | -0.53       | -0.45    | <b>-0.98</b> | <b>-0.92</b> | -0.54        | <b>-0.69</b> | <b>-0.68</b> | <b>-0.81</b> | <b>-0.68</b>   | <b>-0.94</b>   | -0.05        | <b>0.79</b> | 0.23         | <b>0.91</b>  | 0.34  | <b>-0.98</b> | <b>0.81</b> | 1.00  |

B) *Halocnemum strobilaceum*

|                | leaf DW      | leaf RWC | Fv/Fm        | Φ PSII       | NPQ         | Chl <i>a</i> | Chl <i>b</i> | Car          | Chl <i>a+b</i> | Chl <i>a/b</i> | N     | P            | K            | Ca           | Mg           | Na           | K/Na         | Ca/Na |
|----------------|--------------|----------|--------------|--------------|-------------|--------------|--------------|--------------|----------------|----------------|-------|--------------|--------------|--------------|--------------|--------------|--------------|-------|
| leaf DW        | 1.00         |          |              |              |             |              |              |              |                |                |       |              |              |              |              |              |              |       |
| leaf RWC       | 0.28         | 1.00     |              |              |             |              |              |              |                |                |       |              |              |              |              |              |              |       |
| Fv/Fm          | <b>0.95</b>  | 0.42     | 1.00         |              |             |              |              |              |                |                |       |              |              |              |              |              |              |       |
| Φ PSII         | <b>0.94</b>  | 0.18     | <b>0.88</b>  | 1.00         |             |              |              |              |                |                |       |              |              |              |              |              |              |       |
| NPQ            | 0.10         | 0.38     | 0.24         | -0.16        | 1.00        |              |              |              |                |                |       |              |              |              |              |              |              |       |
| Chl <i>a</i>   | <b>0.91</b>  | 0.46     | <b>0.90</b>  | <b>0.93</b>  | 0.03        | 1.00         |              |              |                |                |       |              |              |              |              |              |              |       |
| Chl <i>b</i>   | <b>0.89</b>  | 0.45     | <b>0.88</b>  | <b>0.91</b>  | 0.00        | <b>0.99</b>  | 1.00         |              |                |                |       |              |              |              |              |              |              |       |
| Car            | <b>0.89</b>  | 0.49     | <b>0.89</b>  | <b>0.88</b>  | 0.08        | <b>0.99</b>  | <b>0.99</b>  | 1.00         |                |                |       |              |              |              |              |              |              |       |
| Chl <i>a+b</i> | <b>0.91</b>  | 0.45     | <b>0.90</b>  | <b>0.92</b>  | 0.02        | <b>0.99</b>  | <b>0.99</b>  | <b>0.99</b>  | 1.00           |                |       |              |              |              |              |              |              |       |
| Chl <i>a/b</i> | <b>0.96</b>  | 0.43     | <b>0.94</b>  | <b>0.88</b>  | 0.29        | <b>0.91</b>  | <b>0.87</b>  | <b>0.89</b>  | <b>0.90</b>    | 1.00           |       |              |              |              |              |              |              |       |
| N              | 0.21         | 0.21     | 0.12         | 0.19         | -0.20       | 0.10         | 0.06         | 0.03         | 0.09           | 0.20           | 1.00  |              |              |              |              |              |              |       |
| P              | <b>-0.63</b> | -0.32    | <b>-0.71</b> | -0.52        | -0.49       | <b>-0.60</b> | <b>-0.60</b> | <b>-0.65</b> | <b>-0.60</b>   | <b>-0.68</b>   | 0.43  | 1.00         |              |              |              |              |              |       |
| K              | <b>0.72</b>  | 0.49     | <b>0.80</b>  | 0.55         | <b>0.59</b> | <b>0.60</b>  | <b>0.57</b>  | <b>0.62</b>  | <b>0.60</b>    | <b>0.80</b>    | 0.17  | <b>-0.77</b> | 1.00         |              |              |              |              |       |
| Ca             | <b>-0.86</b> | -0.47    | <b>-0.82</b> | <b>-0.78</b> | -0.14       | <b>-0.85</b> | <b>-0.82</b> | <b>-0.84</b> | <b>-0.85</b>   | <b>-0.87</b>   | -0.48 | 0.39         | <b>-0.66</b> | 1.00         |              |              |              |       |
| Mg             | <b>-0.92</b> | -0.44    | <b>-0.91</b> | <b>-0.82</b> | -0.28       | <b>-0.93</b> | <b>-0.91</b> | <b>-0.95</b> | <b>-0.92</b>   | <b>-0.93</b>   | 0.04  | <b>0.80</b>  | <b>-0.76</b> | <b>0.82</b>  | 1.00         |              |              |       |
| Na             | <b>0.76</b>  | 0.18     | <b>0.75</b>  | <b>0.81</b>  | -0.06       | <b>0.78</b>  | <b>0.78</b>  | <b>0.78</b>  | <b>0.78</b>    | <b>0.74</b>    | -0.29 | <b>-0.75</b> | 0.43         | -0.47        | <b>-0.78</b> | 1.00         |              |       |
| K/Na           | <b>0.70</b>  | 0.49     | <b>0.78</b>  | 0.53         | <b>0.60</b> | <b>0.58</b>  | 0.55         | <b>0.59</b>  | <b>0.58</b>    | <b>0.79</b>    | 0.19  | <b>-0.75</b> | <b>0.99</b>  | <b>-0.66</b> | <b>-0.74</b> | 0.39         | 1.00         |       |
| Ca/Na          | <b>-0.92</b> | -0.45    | <b>-0.88</b> | <b>-0.86</b> | -0.12       | <b>-0.92</b> | <b>-0.89</b> | <b>-0.91</b> | <b>-0.91</b>   | <b>-0.92</b>   | -0.37 | 0.50         | <b>-0.69</b> | <b>0.98</b>  | <b>0.89</b>  | <b>-0.62</b> | <b>-0.68</b> | 1.00  |



C) *Juncus maritimus*

|                | leaf DW      | leaf RWC     | Fv/Fm        | Φ PSII       | NPQ          | Chl <i>a</i> | Chl <i>b</i> | Car          | Chl <i>a+b</i> | Chl <i>a/b</i> | N            | P           | K            | Ca    | Mg           | Na           | K/Na        | Ca/Na |
|----------------|--------------|--------------|--------------|--------------|--------------|--------------|--------------|--------------|----------------|----------------|--------------|-------------|--------------|-------|--------------|--------------|-------------|-------|
| leaf DW        | 1.00         |              |              |              |              |              |              |              |                |                |              |             |              |       |              |              |             |       |
| leaf RWC       | <b>0.64</b>  | 1.00         |              |              |              |              |              |              |                |                |              |             |              |       |              |              |             |       |
| Fv/Fm          | <b>0.89</b>  | 0.42         | 1.00         |              |              |              |              |              |                |                |              |             |              |       |              |              |             |       |
| Φ PSII         | <b>0.89</b>  | 0.44         | <b>0.99</b>  | 1.00         |              |              |              |              |                |                |              |             |              |       |              |              |             |       |
| NPQ            | <b>0.80</b>  | 0.34         | <b>0.90</b>  | <b>0.88</b>  | 1.00         |              |              |              |                |                |              |             |              |       |              |              |             |       |
| Chl <i>a</i>   | <b>0.78</b>  | <b>0.69</b>  | <b>0.73</b>  | <b>0.77</b>  | 0.53         | 1.00         |              |              |                |                |              |             |              |       |              |              |             |       |
| Chl <i>b</i>   | <b>0.74</b>  | <b>0.66</b>  | <b>0.67</b>  | <b>0.71</b>  | 0.47         | <b>0.99</b>  | 1.00         |              |                |                |              |             |              |       |              |              |             |       |
| Car            | <b>0.78</b>  | <b>0.66</b>  | <b>0.78</b>  | <b>0.81</b>  | <b>0.58</b>  | <b>0.99</b>  | <b>0.98</b>  | 1.00         |                |                |              |             |              |       |              |              |             |       |
| Chl <i>a+b</i> | <b>0.77</b>  | <b>0.69</b>  | <b>0.72</b>  | <b>0.75</b>  | 0.51         | <b>0.99</b>  | <b>0.99</b>  | <b>0.99</b>  | 1.00           |                |              |             |              |       |              |              |             |       |
| Chl <i>a/b</i> | <b>0.89</b>  | 0.44         | <b>0.99</b>  | <b>0.99</b>  | <b>0.90</b>  | <b>0.75</b>  | <b>0.69</b>  | <b>0.79</b>  | <b>0.74</b>    | 1.00           |              |             |              |       |              |              |             |       |
| N              | 0.46         | <b>0.80</b>  | 0.10         | 0.11         | 0.01         | 0.41         | 0.39         | 0.32         | 0.41           | 0.12           | 1.00         |             |              |       |              |              |             |       |
| P              | <b>-0.80</b> | <b>-0.60</b> | <b>-0.62</b> | <b>-0.61</b> | <b>-0.59</b> | -0.43        | -0.35        | -0.39        | -0.42          | <b>-0.62</b>   | <b>-0.68</b> | 1.00        |              |       |              |              |             |       |
| K              | <b>-0.96</b> | <b>-0.70</b> | <b>-0.76</b> | <b>-0.76</b> | <b>-0.61</b> | <b>-0.82</b> | <b>-0.79</b> | <b>-0.78</b> | <b>-0.81</b>   | <b>-0.75</b>   | <b>-0.64</b> | <b>0.79</b> | 1.00         |       |              |              |             |       |
| Ca             | <b>-0.70</b> | -0.53        | <b>-0.85</b> | <b>-0.87</b> | <b>-0.74</b> | <b>-0.76</b> | <b>-0.68</b> | <b>-0.80</b> | <b>-0.74</b>   | <b>-0.87</b>   | -0.18        | 0.54        | <b>0.59</b>  | 1.00  |              |              |             |       |
| Mg             | -0.40        | -0.11        | -0.16        | -0.17        | -0.07        | -0.42        | -0.49        | -0.37        | -0.44          | -0.16          | -0.23        | 0.05        | 0.52         | -0.15 | 1.00         |              |             |       |
| Na             | <b>-0.65</b> | -0.18        | <b>-0.65</b> | <b>-0.65</b> | <b>-0.57</b> | <b>-0.66</b> | <b>-0.69</b> | <b>-0.67</b> | <b>-0.67</b>   | <b>-0.63</b>   | 0.08         | 0.11        | <b>0.61</b>  | 0.32  | <b>0.71</b>  | 1.00         |             |       |
| K/Na           | <b>0.65</b>  | <b>0.58</b>  | 0.53         | 0.56         | 0.36         | <b>0.92</b>  | <b>0.95</b>  | <b>0.89</b>  | <b>0.93</b>    | 0.54           | 0.35         | -0.21       | <b>-0.73</b> | -0.48 | <b>-0.65</b> | <b>-0.78</b> | 1.00        |       |
| Ca/Na          | <b>0.65</b>  | <b>0.58</b>  | 0.49         | 0.51         | 0.31         | <b>0.88</b>  | <b>0.93</b>  | <b>0.85</b>  | <b>0.89</b>    | 0.49           | 0.41         | -0.24       | <b>-0.76</b> | -0.39 | <b>-0.72</b> | <b>-0.78</b> | <b>0.99</b> | 1.00  |

D) *Phragmites australis*

|                | leaf DW      | leaf RWC     | Fv/Fm       | Φ PSII      | NPQ         | Chl <i>a</i> | Chl <i>b</i> | Car          | Chl <i>a+b</i> | Chl <i>a/b</i> | N           | P           | K            | Ca          | Mg           | Na           | K/Na        | Ca/Na |
|----------------|--------------|--------------|-------------|-------------|-------------|--------------|--------------|--------------|----------------|----------------|-------------|-------------|--------------|-------------|--------------|--------------|-------------|-------|
| leaf DW        | 1.00         |              |             |             |             |              |              |              |                |                |             |             |              |             |              |              |             |       |
| leaf RWC       | <b>0.95</b>  | 1.00         |             |             |             |              |              |              |                |                |             |             |              |             |              |              |             |       |
| Fv/Fm          | <b>0.93</b>  | <b>0.94</b>  | 1.00        |             |             |              |              |              |                |                |             |             |              |             |              |              |             |       |
| Φ PSII         | <b>0.96</b>  | <b>0.94</b>  | <b>0.99</b> | 1.00        |             |              |              |              |                |                |             |             |              |             |              |              |             |       |
| NPQ            | <b>0.90</b>  | <b>0.91</b>  | <b>0.99</b> | <b>0.99</b> | 1.00        |              |              |              |                |                |             |             |              |             |              |              |             |       |
| Chl <i>a</i>   | <b>0.96</b>  | <b>0.97</b>  | <b>0.99</b> | <b>0.98</b> | <b>0.96</b> | 1.00         |              |              |                |                |             |             |              |             |              |              |             |       |
| Chl <i>b</i>   | <b>0.96</b>  | <b>0.97</b>  | <b>0.98</b> | <b>0.98</b> | <b>0.96</b> | <b>0.99</b>  | 1.00         |              |                |                |             |             |              |             |              |              |             |       |
| Car            | <b>0.98</b>  | <b>0.97</b>  | <b>0.98</b> | <b>0.98</b> | <b>0.95</b> | <b>0.98</b>  | <b>0.97</b>  | 1.00         |                |                |             |             |              |             |              |              |             |       |
| Chl <i>a+b</i> | <b>0.96</b>  | <b>0.97</b>  | <b>0.99</b> | <b>0.98</b> | <b>0.96</b> | <b>0.99</b>  | <b>0.99</b>  | <b>0.96</b>  | 1.00           |                |             |             |              |             |              |              |             |       |
| Chl <i>a/b</i> | <b>0.93</b>  | <b>0.94</b>  | <b>0.99</b> | <b>0.99</b> | <b>0.99</b> | <b>0.99</b>  | <b>0.98</b>  | <b>0.97</b>  | <b>0.98</b>    | 1.00           |             |             |              |             |              |              |             |       |
| N              | <b>0.86</b>  | <b>0.83</b>  | <b>0.85</b> | <b>0.84</b> | <b>0.80</b> | <b>0.91</b>  | <b>0.91</b>  | <b>0.91</b>  | <b>0.91</b>    | <b>0.85</b>    | 1.00        |             |              |             |              |              |             |       |
| P              | <b>0.59</b>  | 0.42         | <b>0.67</b> | <b>0.67</b> | <b>0.68</b> | <b>0.63</b>  | <b>0.63</b>  | <b>0.63</b>  | <b>0.63</b>    | <b>0.67</b>    | <b>0.70</b> | 1.00        |              |             |              |              |             |       |
| K              | <b>0.90</b>  | <b>0.97</b>  | <b>0.95</b> | <b>0.95</b> | <b>0.94</b> | <b>0.94</b>  | <b>0.93</b>  | <b>0.93</b>  | <b>0.94</b>    | <b>0.95</b>    | <b>0.71</b> | 0.41        | 1.00         |             |              |              |             |       |
| Ca             | <b>0.83</b>  | <b>0.76</b>  | <b>0.93</b> | <b>0.92</b> | <b>0.93</b> | <b>0.89</b>  | <b>0.89</b>  | <b>0.88</b>  | <b>0.89</b>    | <b>0.93</b>    | <b>0.83</b> | <b>0.89</b> | <b>0.77</b>  | 1.00        |              |              |             |       |
| Mg             | <b>0.84</b>  | <b>0.96</b>  | <b>0.86</b> | <b>0.86</b> | <b>0.84</b> | <b>0.88</b>  | <b>0.88</b>  | <b>0.88</b>  | <b>0.88</b>    | <b>0.86</b>    | <b>0.67</b> | 0.21        | <b>0.97</b>  | <b>0.62</b> | 1.00         |              |             |       |
| Na             | <b>-0.57</b> | <b>-0.75</b> | -0.55       | -0.55       | -0.53       | <b>-0.57</b> | <b>-0.57</b> | <b>-0.57</b> | <b>-0.57</b>   | -0.55          | -0.30       | 0.24        | <b>-0.78</b> | -0.21       | <b>-0.89</b> | 1.00         |             |       |
| K/Na           | <b>0.88</b>  | <b>0.94</b>  | <b>0.83</b> | <b>0.83</b> | <b>0.77</b> | <b>0.91</b>  | <b>0.91</b>  | <b>0.91</b>  | <b>0.91</b>    | <b>0.83</b>    | <b>0.90</b> | 0.36        | <b>0.84</b>  | <b>0.66</b> | <b>0.88</b>  | <b>-0.66</b> | 1.00        |       |
| Ca/Na          | <b>0.85</b>  | <b>0.92</b>  | <b>0.80</b> | <b>0.79</b> | <b>0.73</b> | <b>0.88</b>  | <b>0.88</b>  | <b>0.89</b>  | <b>0.88</b>    | <b>0.80</b>    | <b>0.87</b> | 0.30        | <b>0.82</b>  | <b>0.61</b> | <b>0.88</b>  | <b>-0.69</b> | <b>0.99</b> | 1.00  |
